# Supplementary material for: The hepatoprotective effect of the probiotic Clostridium butyricum against carbon tetrachloride-induced acute liver damage in mice
Source: Royal Society of Chemistry journal article supplement (doi:10.1039/c7fo00355b), 2017-01-01
Supplement: c7fo00355b4.pdf [file c7fo00355b4.pdf]

### Supplmental figure legend

**Figure S1.** Shannon diversity in the different treatment groups. The data were expressed as the mean±SD ( $n=6$ ). \*:  $P<0.05$ .

**Figure S2.** The intestinal microbiota abundance at phylum level. The data were expressed as mean±SD ( $n=6$ ). \*\*\*:  $P<0.001$ .

**Figure S3.** The intestinal microbiota statistics at genera level ( $n=6$ ). N: normal group; M: model group; and C: *C. butyricum* group.
