# Supplementary figures and images for: The hepatoprotective effect of the probiotic Clostridium butyricum against carbon tetrachloride-induced acute liver damage in mice
Source: Royal Society of Chemistry journal article supplement (doi:10.1039/c7fo00355b), 2017-01-01

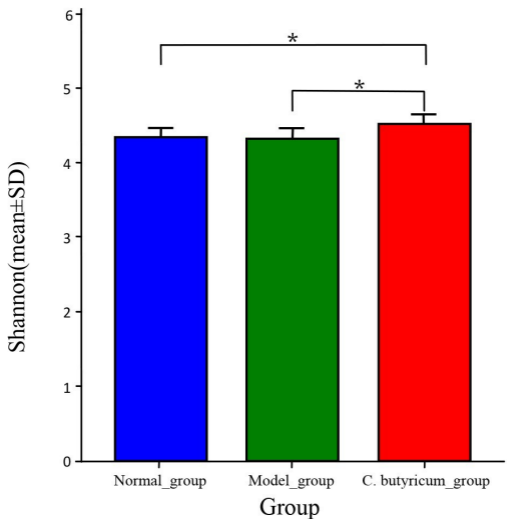

Supplement: c7fo00355b1.pdf [file c7fo00355b1.pdf]

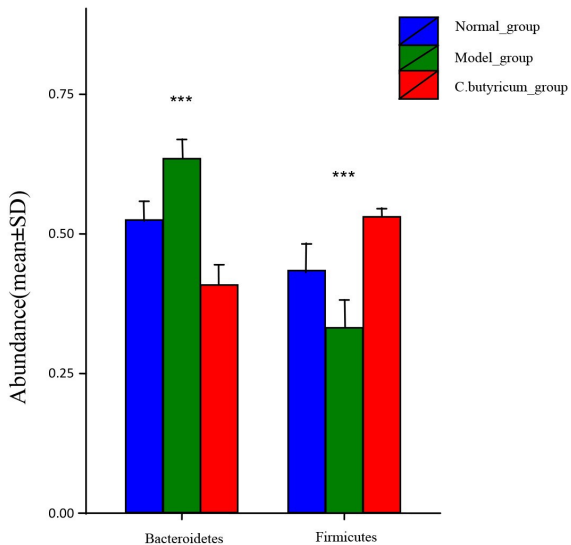

Figure S2

Supplement: c7fo00355b2.pdf [file c7fo00355b2.pdf]

## genus distribution statistics

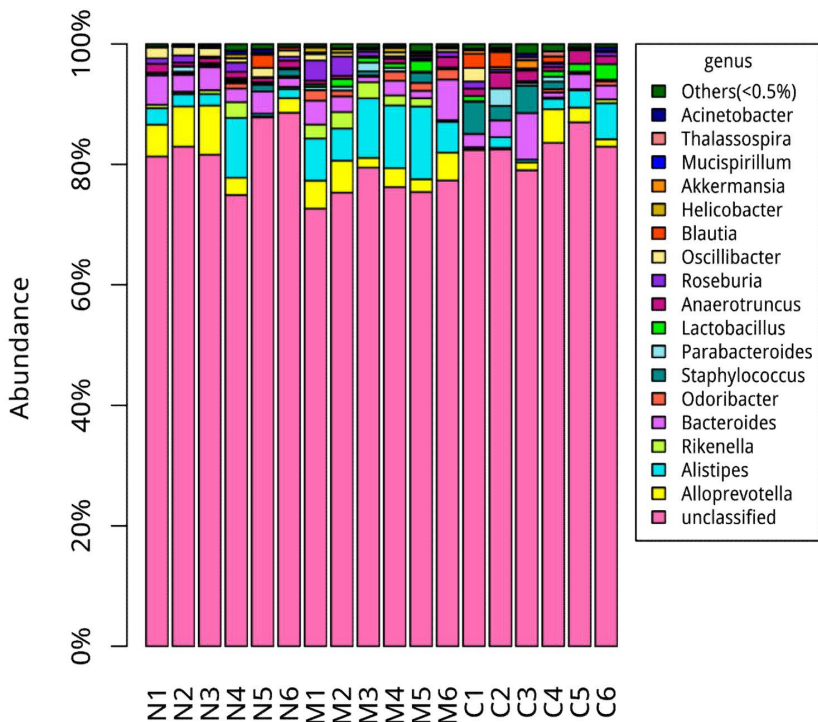

Figure S3

Supplement: c7fo00355b3.pdf [file c7fo00355b3.pdf]
